# Supplementary material for: Polymer supported ZIF-8 membranes prepared via an interfacial synthesis method
Source: Royal Society of Chemistry journal article supplement (doi:10.1039/c4cc06699e), 2014-11-25
Supplement: c4cc06699e1.pdf [file c4cc06699e1.pdf]

## Electronic Supplementary information (ESI)

# Polymer supported ZIF-8 membranes prepared via an interfacial synthesis method

**Yanbo Li<sup>a</sup>, Lik H. Wee<sup>a</sup>, Alexander Volodin<sup>b</sup>, Johan A. Martens<sup>a</sup>**

**and Ivo F.J.Vankelecom<sup>a\*</sup>**

*Centre for Surface Chemistry and Catalysis, KU Leuven, Kasteelpark Arenberg 23,*

*B3001, Heverlee, Leuven. Fax: +32 16 321998; Tel: +32 16 321594;*

*E-mail: ivo.vankelecom@biw.kuleuven.be.*

# 1. Experiments

## 1.1 PES supporting membrane preparation

PES ultrafiltration membranes were prepared for using as supports. The polymer solution (PES X%, PEG 10%, NMP 90-x%, X=16,18,20 and 22%) was cast on a polypropylene non-woven support with a 200  $\mu\text{m}$  casting knife followed by immersing in a room temperature water bath. The membranes were stored in water.

## 1.2 Preparation of ZIF-8 and PES supported ZIF-8 membranes by the interfacial synthesis method

A solution of zinc nitrate (1.5 g) in water (100ml) and a solution of 2-methylimidazole (1.614 g) in hexane (95.6 ml) with co-solvent methanol (1.9ml) and ethanol (2.5ml) were prepared separately. 5 ml of the zinc nitrate solution was added in a glass vial first, 5 ml of the 2-methylimidazole solution was added gently afterwards. Subsequently, a white layer at the interface started to form and to grow toward the water phase. Finally, the solution was centrifuged; the precipitate was washed by water and dried at 120  $^{\circ}\text{C}$ .

For preparation of the PES supported ZIF-8 membrane, the PES supporting membranes were immersed in the zinc nitrate solution for overnight. After removal the excess aqueous solution from the membrane using rubber wiper, the 2-methylimidazole solution as mentioned above was gently poured on the surface. The solution was drained off after certain of reaction time. Finally the membranes were post-treated at 100  $^{\circ}\text{C}$  for overnight.

## 1.3 Characterizations

The ZIF-8 synthesized by the interfacial method (ZIF-8-i) and the membranes were characterized by a powder X-ray diffractometer (STOE StadiP diffractometer in high-throughput transmission mode employing Cu  $K\alpha 1$  radiation). The thermal stability of the ZIF-8-i was investigated by thermo-gravimetric analysis (TGA, Q 500, TA Instruments, US) under nitrogen at a heating rate 5  $^{\circ}\text{C}/\text{min}$  from room temperature to 900  $^{\circ}\text{C}$ .

The morphologies of ZIF-8-i and membranes were characterized by a scanning electron microscope (SEM, Philips XL-30 FEG instrument equipped with a tungsten filament. Prior to

analysis, sample was spread on carbon discs mounted to SEM aluminum pin stubs and gold sputtered.

Attenuated Total Reflection infrared (ATR-IR, Bruker, Alpha) spectrophotometer was employed to investigate the surface chemistry of the membranes.

The water contact angle of the membranes was measured using a DSA 10 Mk2 (Krüss, Germany) system.

AFM measurements were performed on a Multimode AFM equipped with a Nanoscope IV controller (Veeco/Digital Instruments, Santa Barbara, USA). Dry samples were imaged in tapping mode with a drive frequency of 200-300 kHz. Oxide-sharpened silicon-nitride tips with 1nm radius (NCHR, Nanosensors, Germany) were used. The average roughness ( $R_a$ ) and the root-mean-square value ( $R_{ms}$ ) were calculated by Eq.(1) and (2), respectively.

$$R_a = \frac{1}{N} \sum_{i=1}^N |z_i - \bar{z}| \quad \text{equation(1)}$$

$$R_{ms} = \sqrt{\frac{1}{N} \sum_{i=1}^N |z_i - \bar{z}|^2} \quad \text{and equation(2)}$$

## 1.4SRNF experiments

Dead-end filtrations were carried out at room temperature A 17.5  $\mu$  mol Rose Bengal solution in water, ethanol or IPA was used as feed solvent. Membrane permeance and rejection were calculated by

$$P = \frac{W}{t \cdot A \cdot \Delta P} \quad \text{and} \quad R = \left(1 - \frac{C_p}{C_f}\right) \times 100\%$$

where

P is permeability, W weight of the permeate sample, t collecting sample time, A membrane area, R rejection,  $C_p$  the solute concentration in the permeate and  $C_f$  solute concentration in the feed.

In order to investigate the ZIF-8 membrane stability, 50 h SRNF filtration was performed by using RB in IPA as a feed on membrane ZIF-8(1h)/PES-20%.

## 2. Results

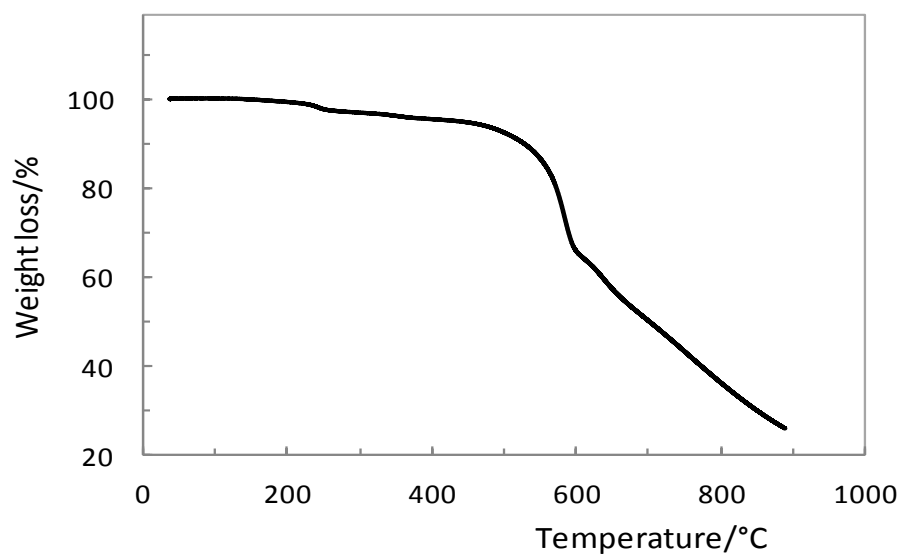

Fig.1 TGA curve of ZIF-8-i

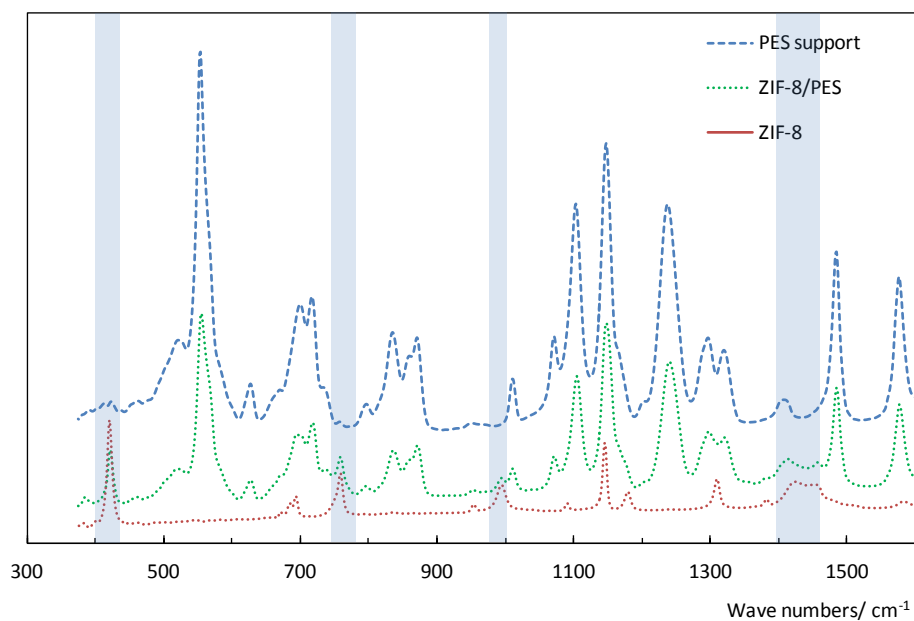

Fig.2 ATR-IR spectra of ZIF-8, PES support and PES supported ZIF-8 membrane (ZIF-8/PES).

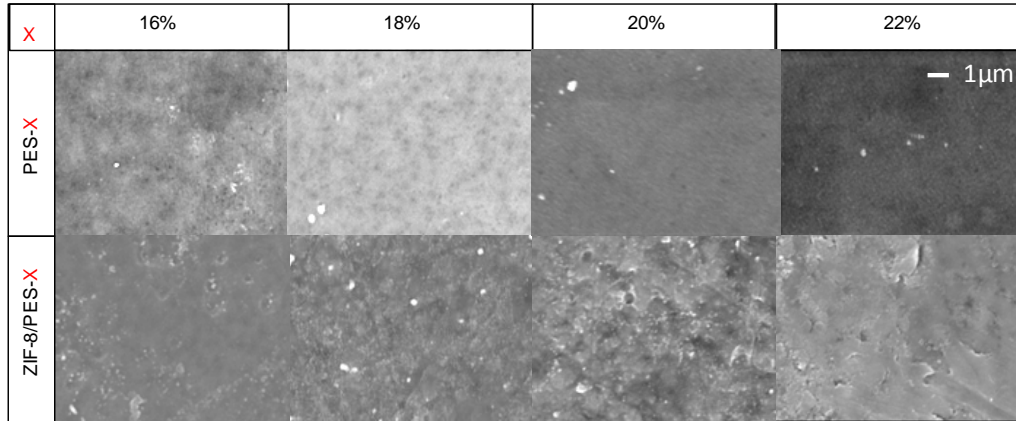

Fig.3 SEM images of membrane surfaces. PES-X, supporting membranes. ZIF-8/PES-X, PES supported ZIF-8 membranes. X indicates the polymer concentration of the support casting solution.

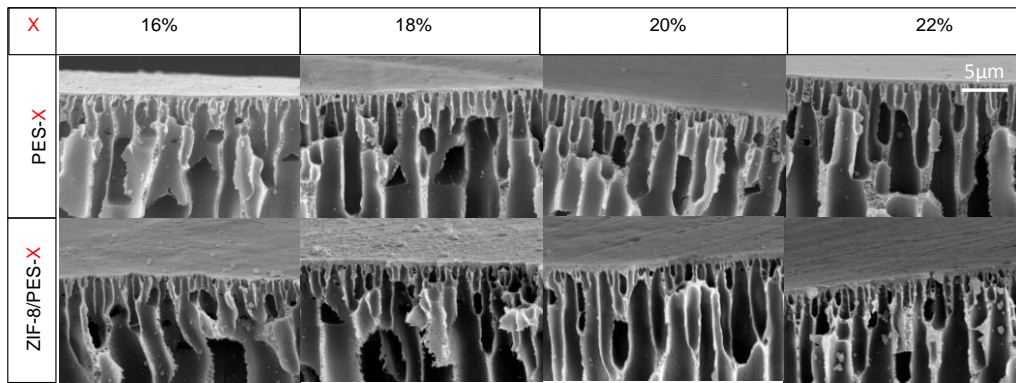

Fig.4 SEM images of membrane cross section. PES-X, supporting membranes. ZIF-8/PES-X, PES supported ZIF-8 membranes. X indicates the polymer concentration of the support casting solution.

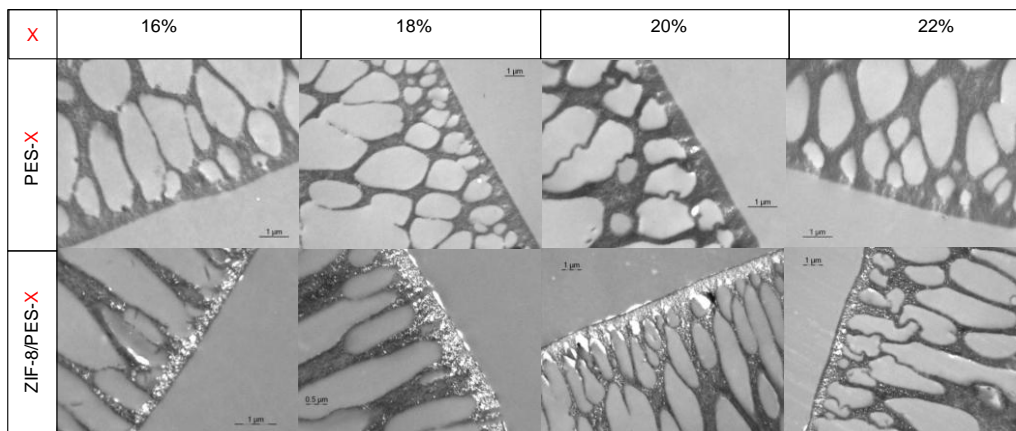

Fig.5 TEM images of membrane cross section. PES-X, supporting membranes. ZIF-8/PES-X, PES supported ZIF-8 membranes. X indicates the polymer concentration of the support casting solution.

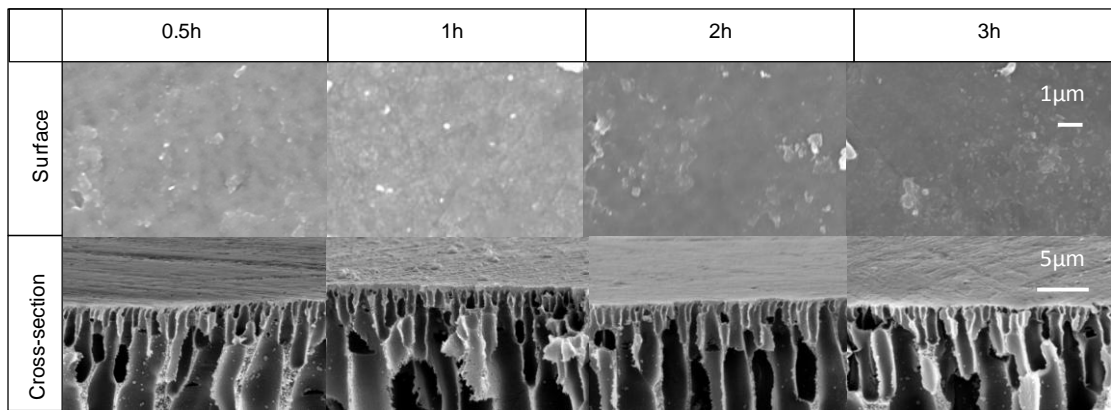

Fig.6 Effect of interfacial reaction time on the surface and cross-section morphologies of the ZIF-8/PES -18% membranes.

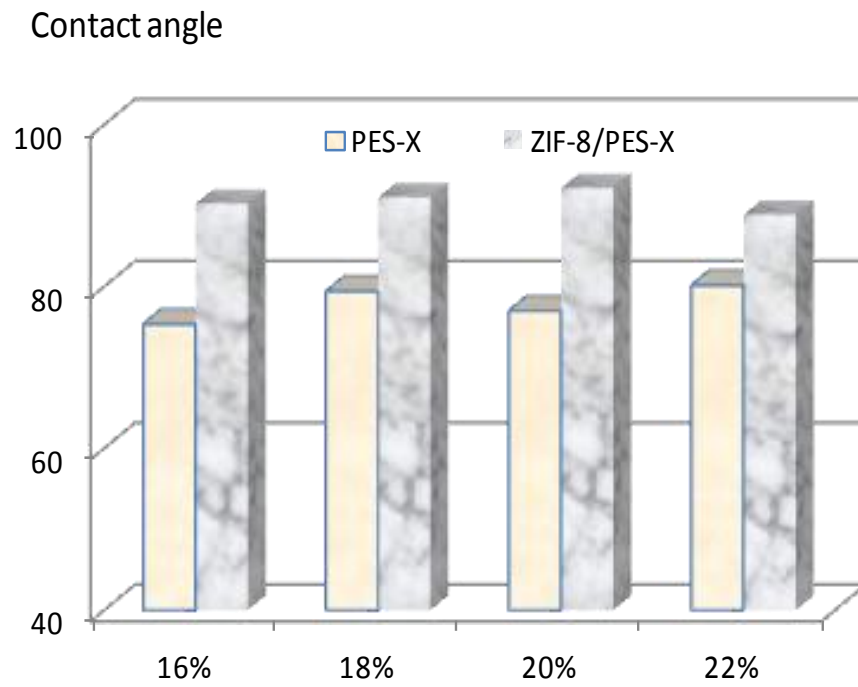

Fig.7 Water contact angle of the membranes. PES-X, supporting membranes. ZIF-8/PES-X, PES supported ZIF-8 membranes. X indicates the polymer concentration of the support casting solution.

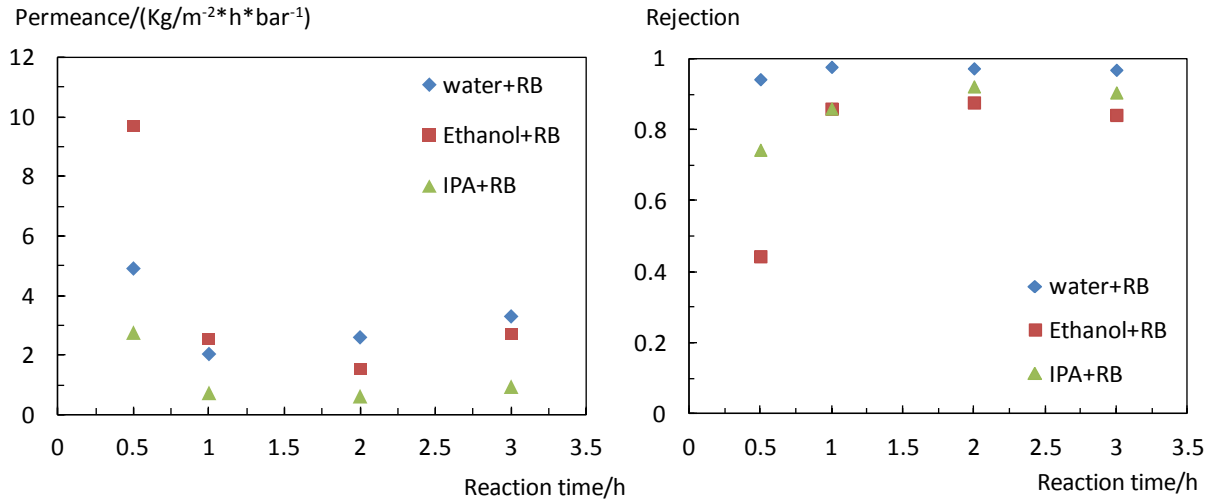

Fig.8 Effect of the interfacial reaction time on the SRNF performance of ZIF-8/PES-18% membranes.

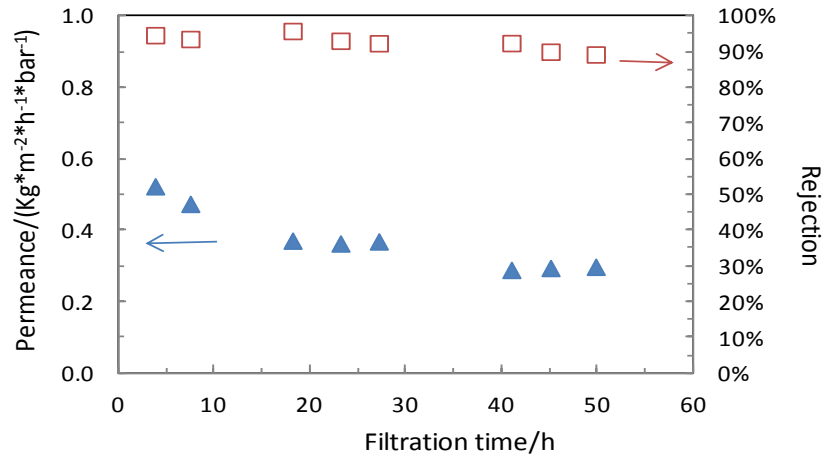

Fig. 9 The results of 50 h SRNF filtration, feed RB in IPA, membrane ZIF-8(1h)/PES-20%.

Table 1 Average ( $R_a$ ) and root-mean-square surface roughness ( $R_{ms}$ ) of the membranes as calculated from the AFM-analysis. PES-X, supporting membranes; ZIF-8/PES-X, PES supported ZIF-8 membranes, interfacial reaction time 1h, X indicates the polymer concentration of the support casting solution.

| Surface roughness<br>(scanned area) | Membranes |              |         |              |          |              |
|-------------------------------------|-----------|--------------|---------|--------------|----------|--------------|
|                                     | PES 16%   | ZIF-8/PES16% | PES 18% | ZIF-8/PES18% | PES 20%  | ZIF-8/PES20% |
| $R_a$ (5 $\mu$ mX5 $\mu$ m)         | 12.0 nm   | 30.4 nm      | 11.2 nm | 21.6 nm      | 9.74 nm  | 19.2 nm      |
| $R_a$ (1 $\mu$ mX1 $\mu$ m)         | 3.46 nm   | 7.0 nm       | 2.71 nm | 4.34 nm      | 2.34 nm  | 5.32 nm      |
| $R_{ms}$ (5 $\mu$ mX5 $\mu$ m)      | 16.9 nm   | 40.5 nm      | 18.3 nm | 29.5 nm      | 12.19 nm | 24.0 nm      |
| $R_{ms}$ (1 $\mu$ mX1 $\mu$ m)      | 4.35 nm   | 9.2 nm       | 3.43 nm | 5.48 nm      | 2.94 nm  | 6.79 nm      |
